# Supplementary material for: Synthesis and characterisation of thioether functionalised gallium and indium alkoxides
Source: Royal Society of Chemistry journal article supplement (doi:10.1039/c5dt02777b), 2015-01-01
Supplement: c5dt02777b1.pdf [file c5dt02777b1.pdf]

## Electronic Supplementary Information

# Synthesis and Coordination Behaviour of Thioether functionalised Gallium and Indium Alkoxides

Sven Barth<sup>1,\*</sup>, Felix Biegger<sup>1</sup>, Michael Puchberger<sup>1</sup>

## Synthesis of alkanols

### Secondary alkanols:

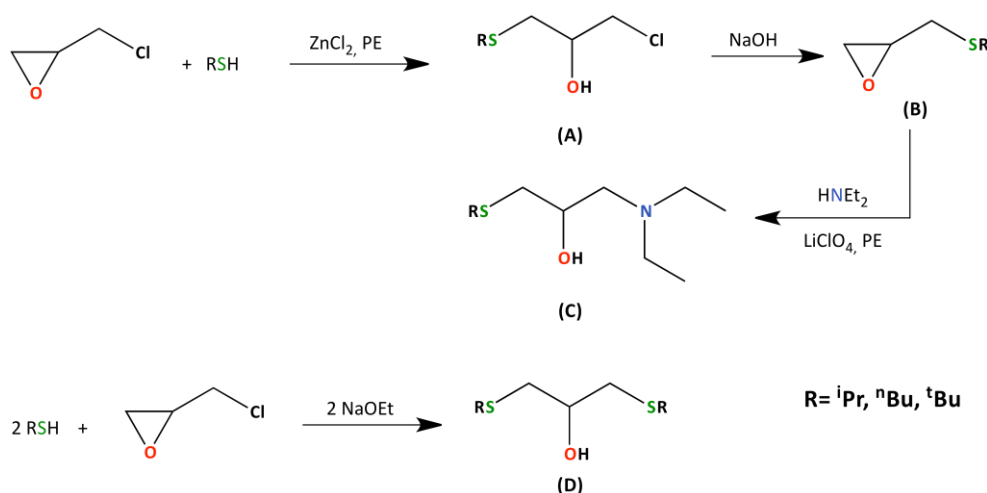

**Scheme. S1:** Flow chart showing the synthesis procedures for symmetrical and asymmetrical secondary alcohol species.

### 1<sup>st</sup> step: 1-Chloro-3-alkylthioprop-2-ol

The reaction was carried out similar to a known procedure reported by Todsén *et al.*<sup>1</sup> Epichlorhydrin, the respective thiol species and ZnCl<sub>2</sub> were mixed and refluxed for 3h. The liquid product was purified by distillation to obtain **A**.

### 2<sup>nd</sup> step: Ring closure and oxirane formation to 2-((alkylthio)methyl)oxirane:

Finely ground NaOH was added to the 1-chloro-3-alkylthioprop-2-ol in 50 ml ether and further refluxed for 2 h. After cooling, saturated brine was added, phases separated and the water phase extracted four times with 50 ml diethyl ether each. The organic phases were dried over Na<sub>2</sub>SO<sub>4</sub>, filtered and the solvent was removed. Distillation of the crude product yielded the desired oxiranes **B**.

### 3<sup>rd</sup> step: Ring opening to gain the desired alcohols.

*Asymmetric alkanols:* An excess of diethylamine, the respective 2-((alkylthio)methyl)oxirane and 0.25 ml 5 M LiClO<sub>4</sub> solution in 20 ml petrol ether were refluxed for 12 h. After cooling, approx. 30 ml saturated brine were added, the phases separated and the water phase extracted 4 times with 50 ml petrol ether. The organic phases were dried over Na<sub>2</sub>SO<sub>4</sub> and the solvent was removed. The crude product was purified via distillation to obtain the asymmetrical alcohol **C**.

### Symmetric alkanols

- Similar to the 1<sup>st</sup> step, the thiol, ZnCl<sub>2</sub> and the 2-((alkylthio)methyl)oxirane were mixed and refluxed for 3h. The product was purified by distillation to obtain **D**.
- 2 equiv. Na were dissolved in absolute ethanol and 2 equiv. of the thiol were added. Subsequently, 1 equiv. epichlorohydrin was added and the mixture was refluxed for 6 h. After cooling to r.t., the mixture was diluted with 50 ml of water and the EtOH removed under reduced pressure. The water phase was then extracted five times with 50 ml petrol ether each. The collected organic phases dried over Na<sub>2</sub>SO<sub>4</sub>, filtered and the solvent was removed. The crude product was distilled to obtain the respective alcohol **D**.

### Tertiary alkanols:

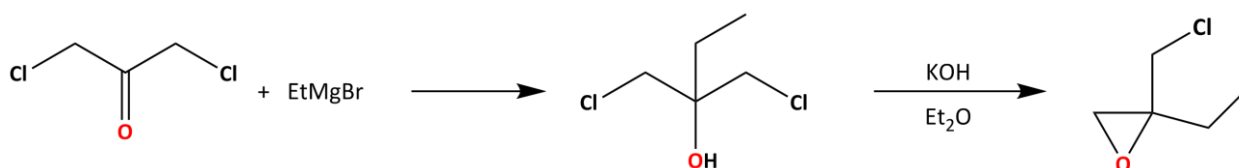

**Scheme. S2:** Flow chart showing the synthesis of the starting compound before the synthetic steps described below are performed.

#### 1<sup>st</sup> step: 1-Chloro-3-alkylthiopropan-2-ol

The synthesis was carried out following procedures described by Tanyeli *et al.*<sup>2</sup>

1 equiv. Mg turnings were covered with dry ether and 1 equiv. ethylbromide was added drop wise until the reaction started. The remaining ethylbromide was diluted with dry ether and added drop wise. After the addition of the ethylbromide, the reaction mixture was refluxed for 3 h until all the Mg was dissolved. 1 equiv. 1,3-dichloroacetone dry ether was slowly added at 0 °C yielding a heterogenic brownish reaction mixture. After adding the ketone, the mixture was further refluxed for 2.5 h and subsequently hydrolysed with saturated NH<sub>4</sub>Cl solution and 1 N hydrochloric acid. Phases were separated and the water phase extracted twice with 75 ml ether. The collected organic phases were washed with saturated brine, dried over Na<sub>2</sub>SO<sub>4</sub>, filtered and the solvent removed to yield a red-brown clear liquid. Fractionated distillation at 74 °C (20 mbar) yielded 1-Chloro-3-alkylthiopropan-2-ol as colourless liquid.

#### 2<sup>nd</sup> step: 2-Chloromethyl-2-ethyloxirane

The ring closing was based on a well-established procedure. This step is similar to the ring closing for secondary alcohols described above in step 2. The 1-Chloro-2-(chloromethyl)butan-2-ol is mixed with potassium hydroxide and 50 ml ether. The further processing is equivalent to procedure S1 (2<sup>nd</sup> step).

The further steps are identical with the synthesis of secondary alcohols as described above.

**Table S1:** Overview of synthesized donor functionalised alcohols and intermediates.

| Compound                                                                | Abbreviation | Boiling point     | Yield               |
|-------------------------------------------------------------------------|--------------|-------------------|---------------------|
| 1- <sup>n</sup> Butylthio-3-chloropropan-2-ol                           | <b>(1-1)</b> | 65 °C / 0.1 mbar  | 44 %                |
| 2-(( <sup>n</sup> Butylthio)methyl)oxirane                              | <b>(1-2)</b> | 70 °C / 6 mbar    | 75 %                |
| 1,3-Bis( <sup>n</sup> butylthio)propan-2-ol                             | <b>(1)</b>   | 144 °C / 4 mbar   | 93 %                |
| 1- <sup>t</sup> Butylthio-3-chloropropan-2-ol                           | <b>(2-1)</b> | 90 °C / 5 mbar    | 56 %                |
| 2-(( <sup>t</sup> Butylthio)methyl)oxirane                              | <b>(2-2)</b> | 50 °C / 7 mbar    | 36 %                |
| 1,3-Bis( <sup>t</sup> butylthio)propan-2-ol                             | <b>(2)</b>   | 82 °C / 0.3 mbar  | 80 %                |
| 2-((Isopropylthio)methyl)oxirane                                        | <b>(3-1)</b> | 54 °C / 7 mbar    | 58 %                |
| 1,3-Bis(isopropylthio)propan-2-ol                                       | <b>(3)</b>   | 114 °C / 4 mbar   | 81 %                |
| 1- <sup>n</sup> Butylthio-3-(diethylamino)propan-2-ol                   | <b>(4)</b>   | 113 °C / 5 mbar   | 93 %                |
| 1- <sup>t</sup> Butylthio-3-(diethylamino)propan-2-ol                   | <b>(5)</b>   | 98 °C / 5 mbar    | 94 %                |
| 1-Diethylamino-3-(isopropylthio)propan-2-ol                             | <b>(6)</b>   | 62 °C / 0.3 mbar  | 87 %                |
| 1-Chloro-2-(chloromethyl)butan-2-ol                                     | <b>(7-1)</b> | 74 °C / 20 mbar   | 81 %                |
| 2-Chloromethyl-2-ethyloxirane                                           | <b>(7-2)</b> | 53 °C / 35 mbar   | 80 %                |
| 1- <sup>n</sup> Butylthio-2-(( <sup>n</sup> butylthio)methyl)butan-2-ol | <b>(7)</b>   | 109 °C / 0.4 mbar | 88 %                |
| 1- <sup>t</sup> Butylthio-2-(( <sup>t</sup> butylthio)methyl)butan-2-ol | <b>(8)</b>   | 80 °C / 0.4 mbar  | 82 %                |
| 1-Isopropylthio-2((isopropylthio)methyl)butan-2-ol                      | <b>(9)</b>   | 86 °C / 0.77 mbar | 87 %                |
| 1- <sup>n</sup> Butylthio-2-((diethylamino)methyl)butan-2-ol            | <b>(10)</b>  | 108 °C / 1.2 mbar | 91 % <sup>[1]</sup> |
| 1- <sup>t</sup> Butylthio-2-((diethylamino)methyl)butan-2-ol            | <b>(11)</b>  | 69 °C / 0.2 mbar  | 86 %                |
| 1-Diethylamino-2((isopropylthio)methyl)butan-2-ol                       | <b>(12)</b>  | 75 °C / 0.79 mbar | 69 %                |

## Characterisation of alkanols and their intermediates

### 1-<sup>n</sup>Butylthio-3-chloropropan-2-ol (1-1):

<sup>1</sup>H NMR (CDCl<sub>3</sub>, 250 MHz, +25 °C, δ [ppm]): 0.92 (t, J=7.28 Hz, 3H, CH<sub>3</sub>), 1.41 (m, J=7.34 Hz, 2H, CH<sub>3</sub>-CH<sub>2</sub>), 1.58 (quint, J=7.28 Hz, 2H, CH<sub>2</sub>-CH<sub>2</sub>-CH<sub>2</sub>), 2.56 (t, J=7.27 Hz, 2H, CH<sub>2</sub>-CH<sub>2</sub>-S), 2.60-2.85 (m, 3H, S-CH<sub>2</sub>-CH, OH), 3.66 (d, J=4.62 Hz, 1H, CH<sub>2</sub>-Cl), 3.92 (m, 1H, CH); <sup>13</sup>C {<sup>1</sup>H} NMR (CDCl<sub>3</sub>, 62.86 MHz, +25 °C, δ [ppm]): 13.4 (s, CH<sub>3</sub>CH<sub>2</sub>CH<sub>2</sub>), 21.7 (s, CH<sub>3</sub>CH<sub>2</sub>CH<sub>2</sub>), 31.5 (s, CH<sub>2</sub>CH<sub>2</sub>-S), 32.1 (CH<sub>2</sub>CH<sub>2</sub>-S), 36.0 (s, S-CH<sub>2</sub>-CH), 47.8 (s, CH<sub>2</sub>-Cl), 69.8 (s, CH-OH); IR (ATR, cm<sup>-1</sup>): ν= 3414 (br, OH), 2957 (s, CH), 1041 (s, C-OH); GC-EIMS (m/z) found (calc.): 182.02 (182.05) [M]<sup>+</sup>, 133.03 (133.07) [M -CH<sub>2</sub>Cl]<sup>+</sup>, 103.03 (103.06) [<sup>n</sup>BuSCH<sub>2</sub>]<sup>+</sup>

### 2-((<sup>n</sup>Butylthio)methyl)oxirane (1-2):

<sup>1</sup>H NMR (CDCl<sub>3</sub>, 250 MHz, +25 °C, δ [ppm]): 0.89 (t, J=7.32 Hz, 3H, CH<sub>3</sub>CH<sub>2</sub>CH<sub>2</sub>), 1.38 (m, J=7.06 Hz, 2H, CH<sub>3</sub>CH<sub>2</sub>CH<sub>2</sub>), 1.55 (quint, J=7.12 Hz, 2H, CH<sub>2</sub>CH<sub>2</sub>-S), 2.50-2.83 (m, 6H, CH<sub>2</sub>CH<sub>2</sub>-S, S-CH<sub>2</sub>-CH, CH<sub>2</sub>-O), 3.10 (m, 1H, CH-O); <sup>13</sup>C {<sup>1</sup>H} NMR (CDCl<sub>3</sub>, 62.86 MHz, +25 °C, δ [ppm]): 13.7 (s, CH<sub>3</sub>CH<sub>2</sub>CH<sub>2</sub>), 22.0 (s, CH<sub>3</sub>CH<sub>2</sub>CH<sub>2</sub>), 31.8 (s, CH<sub>2</sub>CH<sub>2</sub>-S), 32.2 (s, CH<sub>2</sub>CH<sub>2</sub>-S), 34.3 (s, S-CH<sub>2</sub>-CH), 47.0 (s, CH<sub>2</sub>-O), 52.0 (s, CH-O); IR (ATR, cm<sup>-1</sup>): ν= 2957 (s, CH), 826 (s, Epoxide ringmode); GC-EIMS (m/z) found (calc.): 146.02 (146.07) [M]<sup>+</sup>, 103.05 (103.06) [<sup>n</sup>BuSCH<sub>2</sub>]<sup>+</sup>, 61.03 (61.01) [EtS]<sup>+</sup>

### 1,3-Bis(<sup>n</sup>butylthio)propan-2-ol (1):

<sup>1</sup>H NMR (CDCl<sub>3</sub>, 250 MHz, +25 °C, δ [ppm]): 0.90 (t, J=7.24 Hz, 6H, CH<sub>3</sub>CH<sub>2</sub>CH<sub>2</sub>), 1.39 (m, J=7.42 Hz, 4H, CH<sub>3</sub>CH<sub>2</sub>CH<sub>2</sub>), 1.56 (quint, J=7.26 Hz, 4H, CH<sub>2</sub>CH<sub>2</sub>-S), 2.54 (t, J=7.08 Hz, 4H, CH<sub>2</sub>CH<sub>2</sub>-S), 2.60 (dd, J=7.47 / 13.49 Hz, 2H, S-CH<sub>2</sub>-CH), 2.75 (dd, J=4.75 / 13.49 Hz, 2H, S-CH<sub>2</sub>-CH), 2.91 (d, J=3.02 Hz, 1H, OH), 3.78 (m, 1H, CH); <sup>13</sup>C {<sup>1</sup>H} NMR (CDCl<sub>3</sub>, 62.86 MHz, +25 °C, δ [ppm]): 13.5 (s, CH<sub>3</sub>CH<sub>2</sub>CH<sub>2</sub>), 21.8 (s, CH<sub>3</sub>CH<sub>2</sub>CH<sub>2</sub>), 31.7 (s, CH<sub>2</sub>CH<sub>2</sub>-S), 32.2 (s, CH<sub>2</sub>CH<sub>2</sub>-S), 38.2 (s, S-CH<sub>2</sub>-CH), 68.7 (s, CH-OH); IR (ATR, cm<sup>-1</sup>): ν= 3437 (br, OH), 2966 (s, CH), 1026 (s, C-OH); GC-EIMS (m/z) found (calc.): 236.08 (236.13) [M]<sup>+</sup>, 218.09 (218.12) [M -H<sub>2</sub>O]<sup>+</sup>, 179.02 (179.06) [M -C<sub>4</sub>H<sub>9</sub>]<sup>+</sup>

### 1-<sup>t</sup>Butylthio-3-chloropropan-2-ol (2-1):

<sup>1</sup>H NMR (CDCl<sub>3</sub>, 250 MHz, +25 °C, δ [ppm]): 1.33 (s, 9H, C(CH<sub>3</sub>)<sub>3</sub>), 2.61 (s, 1H, OH), 2.72 (dd, J=6.88 / 13.03 Hz, 1H, S-CH<sub>2</sub>-CH), 2.81 (dd, J=5.69 / 13.03 Hz, 1H, S-CH<sub>2</sub>-CH), 3.57-3.70 (m, 2H, CH<sub>2</sub>-Cl), 3.91 (m, J=5.67 Hz, 1H, CH); <sup>13</sup>C {<sup>1</sup>H} NMR (CDCl<sub>3</sub>, 62.86 MHz, +25 °C, δ [ppm]): 31.1 (s, C(CH<sub>3</sub>)<sub>3</sub>), 32.9 (s, S-CH<sub>2</sub>-CH), 42.9 (s, C(CH<sub>3</sub>)<sub>3</sub>), 48.4 (s, CH<sub>2</sub>-Cl), 70.4 (CH-OH); IR (ATR, cm<sup>-1</sup>): ν= 3407 (br, OH), 2961 (s, CH), 1043 (s, C-OH); GC-EIMS (m/z) found (calc.): 182.01 (182.05) [M]<sup>+</sup>, 107.98 (107.98) [M -<sup>t</sup>BuOH]<sup>+</sup>, 57.08 (57.07) [<sup>t</sup>C<sub>4</sub>H<sub>9</sub>]<sup>+</sup>

### 2-((<sup>t</sup>Butylthio)methyl)oxirane (2-2):

<sup>1</sup>H NMR (CDCl<sub>3</sub>, 250 MHz, +25 °C, δ [ppm]): 1.32 (s, 9H, C(CH<sub>3</sub>)<sub>3</sub>), 2.48-2.60 (m, 2H, S-CH<sub>2</sub>-CH), 2.74-2.86 (m, 2H, CH<sub>2</sub>-O), 3.07 (m, 1H, CH-O); <sup>13</sup>C {<sup>1</sup>H} NMR (CDCl<sub>3</sub>, 62.86 MHz, +25 °C, δ [ppm]): 30.9 (s, C(CH<sub>3</sub>)<sub>3</sub>), 31.1 (s, S-CH<sub>2</sub>), 42.2 (s, C(CH<sub>3</sub>)<sub>3</sub>), 47.6 (s, CH<sub>2</sub>-O), 51.6 (s, CH-O); IR (ATR, cm<sup>-1</sup>): ν= 2962 (s, CH), 835 (s, Epoxide ringmode); GC-EIMS (m/z) found (calc.): 146.04 (146.08) [M]<sup>+</sup>, 90.05 (90.05) [<sup>t</sup>BuSH]<sup>+</sup>, 57.08 (57.07) [<sup>t</sup>C<sub>4</sub>H<sub>9</sub>]<sup>+</sup>

1,3-Bis(<sup>t</sup>butylthio)propan-2-ol (2):

<sup>1</sup>H NMR (CDCl<sub>3</sub>, 250 MHz, +25 °C, δ [ppm]): 1.32 (s, 18H, C(CH<sub>3</sub>)<sub>3</sub>), 2.66 (dd, J=7.11/12.77 Hz, 2H, S-CH<sub>2</sub>-CH), 2.75-2.83 (m, 3H, S-CH<sub>2</sub>-CH, OH), 3.78 (m, 1H, CH); <sup>13</sup>C {<sup>1</sup>H} NMR (CDCl<sub>3</sub>, 62.86 MHz, +25 °C, δ [ppm]): 31.2 (s, C(CH<sub>3</sub>)<sub>3</sub>), 35.2 (s, CH<sub>2</sub>-S), 42.6 (s, C(CH<sub>3</sub>)<sub>3</sub>), 69.9 (CH-OH); IR (ATR, cm<sup>-1</sup>): ν= 3435 (br, OH), 2960 (s, CH), 1031 (s, C-OH); GC-EIMS (m/z) found (calc.): 179.02 (179.06) [M -<sup>t</sup>C<sub>4</sub>H<sub>9</sub>]<sup>+</sup>, 122.92 (122.99) [M -<sup>t</sup>C<sub>4</sub>H<sub>9</sub> - C<sub>4</sub>H<sub>8</sub>]<sup>+</sup>, 57.04 (57.08) [<sup>t</sup>C<sub>4</sub>H<sub>9</sub>]<sup>+</sup>

2-((Isopropylthio)methyl)oxirane (3-1):

<sup>1</sup>H NMR (CDCl<sub>3</sub>, 250 MHz, +25 °C, δ [ppm]): 1.26 (d, J=6.74 Hz, 6H, CH(CH<sub>3</sub>)<sub>2</sub>), 2.52-2.84 (m, 4H, S-CH<sub>2</sub>-CH, CH<sub>2</sub>-O), 3.02 (m, J=6.67 Hz, 1H, CH(CH<sub>3</sub>)<sub>2</sub>), 3.10 (m, 1H, CH-O); <sup>13</sup>C {<sup>1</sup>H} NMR (CDCl<sub>3</sub>, 62.86 MHz, +25 °C, δ [ppm]): 23.4 (s, CH(CH<sub>3</sub>)<sub>2</sub>), 32.8 (s, S-CH<sub>2</sub>-CH), 35.2 (s, CH(CH<sub>3</sub>)<sub>2</sub>), 47.1 (s, CH<sub>2</sub>-O), 51.9 (CH-O); IR (ATR, cm<sup>-1</sup>): ν= 2961 (s, CH), 827 (s, Epoxide ringmode); GC-EIMS (m/z) found (calc.): 132.01 (132.06) [M]<sup>+</sup>, 89.03 (89.01) [M -<sup>i</sup>C<sub>3</sub>H<sub>7</sub>]<sup>+</sup>, 74.04 (74.15) [CH<sub>3</sub>-C(=S)-CH<sub>3</sub>]<sup>+</sup>

1,3-Bis(isopropylthio)propan-2-ol (3)

<sup>1</sup>H NMR (CDCl<sub>3</sub>, 250 MHz, +25 °C, δ [ppm]): 1.26 (d, J=6.77 Hz, 12H, CH(CH<sub>3</sub>)<sub>2</sub>), 2.63 (dd, J=7.33/13.46 Hz, 2H, S-CH<sub>2</sub>-CH), 2.78 (dd, J=4.94/13.46 Hz, 2H, S-CH<sub>2</sub>-CH), 2.87-3.00 (m, 3H, OH, CH(CH<sub>3</sub>)<sub>2</sub>); <sup>13</sup>C {<sup>1</sup>H} NMR (CDCl<sub>3</sub>, 62.86 MHz, +25 °C, δ [ppm]): 23.6 (s, CH(CH<sub>3</sub>)<sub>2</sub>), 35.5 (s, CH(CH<sub>3</sub>)<sub>2</sub>), 36.9 (s, S-CH<sub>2</sub>-CH), 69.3 (s, CH-OH); IR (ATR, cm<sup>-1</sup>): ν= 3440 (br, OH), 2956 (s, CH), 1025 (s, C-OH); GC-EIMS (m/z) found (calc.): 208.08 (208.10) [M]<sup>+</sup>, 165.99 (165.04) [M -<sup>i</sup>C<sub>3</sub>H<sub>7</sub>]<sup>+</sup>, 122.95 (122.99) [M -2<sup>i</sup>C<sub>3</sub>H<sub>7</sub>]<sup>+</sup>

1-<sup>n</sup>Butylthio-3-(diethylamino)propan-2-ol (4):

<sup>1</sup>H NMR (CDCl<sub>3</sub>, 250 MHz, +25 °C, δ [ppm]): 0.89 (t, J=7.13 Hz, 3H, CH<sub>3</sub>CH<sub>2</sub>CH<sub>2</sub>), 1.00 (t, J=7.12 Hz, 6H, N(CH<sub>2</sub>CH<sub>3</sub>)<sub>2</sub>), 1.38 (m, J=7.14 Hz, 2H, CH<sub>3</sub>CH<sub>2</sub>CH<sub>2</sub>), 1.56 (quint, J=7.34 Hz, 2H, CH<sub>2</sub>CH<sub>2</sub>-S), 2.25-2.70 (m, 10H, CH<sub>2</sub>CH<sub>2</sub>-S, S-CH<sub>2</sub>-CH, N-CH<sub>2</sub>-CH, N(CH<sub>2</sub>CH<sub>3</sub>)<sub>2</sub>), 3.71 (m, 1H, CH), 3.84 (s, 1H, OH); <sup>13</sup>C {<sup>1</sup>H} NMR (CDCl<sub>3</sub>, 62.86 MHz, +25 °C, δ [ppm]): 12.0 (s, N(CH<sub>2</sub>CH<sub>3</sub>)<sub>2</sub>), 13.6 (s, CH<sub>3</sub>CH<sub>2</sub>CH<sub>2</sub>), 21.9 (s, CH<sub>3</sub>CH<sub>2</sub>CH<sub>2</sub>), 31.8 (s, CH<sub>2</sub>CH<sub>2</sub>-S), 32.7 (s, CH<sub>2</sub>CH<sub>2</sub>-S), 37.0 (s, S-CH<sub>2</sub>-CH), 47.1 (s, N(CH<sub>2</sub>CH<sub>3</sub>)<sub>2</sub>), 58.4 (s, CH-CH<sub>2</sub>-N), 66.8 (s, CH-OH); IR (ATR, cm<sup>-1</sup>): ν= 3436 (br, OH), 2963 (s, CH), 1063 (s, C-OH); GC-EIMS (m/z) found (calc.): 116.03 (116.11) [M -<sup>n</sup>BuSCH<sub>2</sub>]<sup>+</sup>, 86.06 (86.06) [Et<sub>2</sub>NCH<sub>2</sub>]<sup>+</sup>

1-<sup>t</sup>Butylthio-3-(diethylamino)propan-2-ol (5):

<sup>1</sup>H NMR (CDCl<sub>3</sub>, 250 MHz, +25 °C, δ [ppm]): 0.99 (t, J=7.12 Hz, 6H, N(CH<sub>2</sub>CH<sub>3</sub>)<sub>2</sub>), 1.31 (s, 9H, C(CH<sub>3</sub>)<sub>3</sub>), 2.23-2.76 (m, 8H, N(CH<sub>2</sub>CH<sub>3</sub>)<sub>2</sub>, S-CH<sub>2</sub>-CH, N-CH<sub>2</sub>-CH), 3.70 (m, 1H, CH), 3.88 (s, 1H, OH); <sup>13</sup>C {<sup>1</sup>H} NMR (CDCl<sub>3</sub>, 62.86 MHz, +25 °C, δ [ppm]): 12.1 (s, N(CH<sub>2</sub>CH<sub>3</sub>)<sub>2</sub>), 31.0 (s, C(CH<sub>3</sub>)<sub>3</sub>), 33.4 (s, S-CH<sub>2</sub>-CH), 42.1 (s, C(CH<sub>3</sub>)<sub>3</sub>), 47.1 (s, N(CH<sub>2</sub>CH<sub>3</sub>)<sub>2</sub>), 58.8 (s, N-CH<sub>2</sub>-CH), 68.9 (s, CH-OH); IR (ATR, cm<sup>-1</sup>): ν= 3433 (br, OH), 2967 (s, CH), 1060 (s, C-OH); GC-EIMS (m/z) found (calc.): 162.05 (162.95) [M -<sup>t</sup>C<sub>4</sub>H<sub>9</sub>]<sup>+</sup>, 116.11 (116.11) [M -<sup>t</sup>BuSCH<sub>2</sub>]<sup>+</sup>, 86.07 (86.06) [Et<sub>2</sub>NCH<sub>2</sub>]<sup>+</sup>

**1-Diethylamino-3-(isopropylthio)propan-2-ol (6):**

$^1\text{H NMR}$  ( $\text{CDCl}_3$ , 250 MHz, +25 °C,  $\delta$  [ppm]): 0.91 (t,  $J=7.11$  Hz, 6H,  $\text{N}(\text{CH}_2\text{CH}_3)_2$ ), 1.17 (dd,  $J=1.57/6.76$  Hz, 6H,  $\text{CH}(\text{CH}_3)_3$ ), 2.25-2.71 (m, 8H,  $\text{S-CH}_2\text{-CH}$ ,  $\text{N-CH}_2\text{-CH}$ ,  $\text{N}(\text{CH}_2\text{CH}_3)_2$ ), 2.97 (quint, 6.72 Hz, 1H,  $\text{CH}(\text{CH}_3)_3$ ), 3.71 (m, 1H,  $\text{CH}$ ), 3.85 (s, 1H,  $\text{OH}$ );  $^{13}\text{C}$   $\{^1\text{H}\}$  NMR ( $\text{CDCl}_3$ , 62.86 MHz, +25 °C,  $\delta$  [ppm]): 12.1 (s,  $\text{N}(\text{CH}_2\text{CH}_3)_2$ ), 23.6 (s,  $\text{CH}(\text{CH}_3)_2$ ), 35.5 (s,  $\text{CH}(\text{CH}_3)_2$ ), 35.7 (s,  $\text{S-CH}_2\text{-CH}$ ), 47.3 (s,  $\text{N}(\text{CH}_2\text{CH}_3)_2$ ), 58.7 (s,  $\text{N-CH}_2\text{-CH}$ ), 67.0 (s,  $\text{CH-OH}$ ); IR (ATR,  $\text{cm}^{-1}$ ):  $\nu=3434$  (br, OH), 2963 (s, CH), 1063 (s, C-OH); GC-EIMS ( $m/z$ ) found (calc.): 162.07 (162.10) [ $\text{M} - ^i\text{C}_3\text{H}_7$ ] $^+$ , 116.12 (116.11) [ $\text{M} - ^i\text{PrSCH}_2$ ] $^+$ , 86.09 (86.06) [ $\text{Et}_2\text{NCH}_2$ ] $^+$

**1-Chloro-2-(chloromethyl)butan-2-ol (7-1):**

$^1\text{H NMR}$  ( $\text{CDCl}_3$ , 250 MHz, +25 °C,  $\delta$  [ppm]): 0.99 (t,  $J=7.64$  Hz, 3H,  $\text{CH}_3$ ), 1.71 (q,  $J=7.52$  Hz, 2H,  $\text{CH}_2\text{CH}_3$ ), 2.27 (s, 1H,  $\text{OH}$ ), 3.62 (q,  $J=11.40$  Hz, 4H,  $\text{CH}_2\text{-Cl}$ );  $^{13}\text{C}$   $\{^1\text{H}\}$  NMR ( $\text{CDCl}_3$ , 62.86 MHz, +25 °C,  $\delta$  [ppm]): 7.2 (s,  $\text{CH}_3$ ), 27.97 (s,  $\text{CH}_2\text{CH}_3$ ), 48.2 (s,  $\text{CH}_2\text{-Cl}$ ), 74.0 (s,  $\text{C-OH}$ ); IR (ATR,  $\text{cm}^{-1}$ ):  $\nu=3455$  (br, OH), 2971 (m, CH), 1741 (m, OH), 739 (m, C-Cl); GC-EIMS ( $m/z$ ) found (calc.): 126.98 (126.97) [ $\text{M} - \text{C}_2\text{H}_5$ ] $^+$ , 107.01 (107.03) [ $\text{M} - \text{CH}_2\text{Cl}$ ] $^+$ , 91.01 (91.00) [ $\text{M} - \text{HCl} - \text{C}_2\text{H}_5$ ] $^+$

**2-Chloromethyl-2-ethyloxirane (7-2):**

$^1\text{H NMR}$  ( $\text{CDCl}_3$ , 250 MHz, +25 °C,  $\delta$  [ppm]): 0.97 (t,  $J=7.51$  Hz, 3H,  $\text{CH}_3$ ), 1.82 (m, 2H,  $\text{CH}_2\text{CH}_3$ ), 2.77 (s, 2H,  $\text{CH}_2\text{-O}$ ), 3.56 (q,  $J=11.57$  Hz, 2H,  $\text{CH}_2\text{-Cl}$ );  $^{13}\text{C}$   $\{^1\text{H}\}$  NMR ( $\text{CDCl}_3$ , 62.86 MHz, +25 °C,  $\delta$  [ppm]): 8.6 (s,  $\text{CH}_3$ ), 24.5 (s,  $\text{CH}_2\text{CH}_3$ ), 47.6 (s,  $\text{CH}_2\text{-Cl}$ ), 52.3 (s,  $\text{CH}_2\text{-O}$ ), 59.4 (s,  $\text{CH}_2\text{-C-O}$ ); IR (ATR,  $\text{cm}^{-1}$ ):  $\nu=2972$  (m, CH), 734 (s, C-Cl); GC-EIMS ( $m/z$ ) found (calc.): 85.09 (85.06) [ $\text{M} - \text{Cl}$ ] $^+$ , 71.02 (71.05) [ $\text{M} - \text{CH}_2\text{Cl}$ ] $^+$ , 55.10 (55.02) [ $\text{M} - \text{HCl} - \text{C}_2\text{H}_5$ ] $^+$

**1- $^n$ Butylthio-2-( $^n$ butylthio)methyl)butan-2-ol (7):**

$^1\text{H NMR}$  ( $\text{CDCl}_3$ , 250 MHz, +25 °C,  $\delta$  [ppm]): 0.91 (t,  $J=7.23$  Hz, 9H,  $\text{CH}_3\text{CH}_2\text{CH}_2$ ,  $\text{C-CH}_2\text{CH}_3$ ), 1.40 (m,  $J=7.30$  Hz, 4H,  $\text{CH}_3\text{CH}_2\text{CH}_2$ ), 1.59 (m, 6H,  $\text{CH}_2\text{CH}_2\text{-S}$ ,  $\text{C-CH}_2\text{CH}_3$ ), 2.58 (q,  $J=6.94$  Hz, 4H,  $\text{CH}_2\text{CH}_2\text{-S}$ ), 2.65 (d,  $J=13.09$  Hz, 1H,  $\text{S-CH}_2\text{-C}$ ), 2.80 (d,  $J=13.09$  Hz, 1H,  $\text{S-CH}_2\text{-C}$ );  $^{13}\text{C}$   $\{^1\text{H}\}$  NMR ( $\text{CDCl}_3$ , 62.86 MHz, +25 °C,  $\delta$  [ppm]): 8.1 (s,  $\text{C-CH}_2\text{CH}_3$ ), 13.8 (s,  $\text{CH}_3\text{CH}_2\text{CH}_2$ ), 22.0 (s,  $\text{CH}_3\text{CH}_2\text{CH}_2$ ), 31.2 (s,  $\text{C-CH}_2\text{CH}_3$ ), 32.1 (s,  $\text{CH}_2\text{CH}_2\text{-S}$ ), 34.0 (s,  $\text{CH}_2\text{CH}_2\text{-S}$ ), 41.5 (s,  $\text{S-CH}_2\text{-C}$ ), 74.4 (s,  $\text{C-OH}$ ); IR (ATR,  $\text{cm}^{-1}$ ):  $\nu=3466$  (br, OH), 2958 (s, CH), 1223 (m, OH); GC-EIMS ( $m/z$ ) found (calc.): 264.14 (264.16) [ $\text{M}$ ] $^+$ , 161.12 (161.10) [ $\text{M} - ^n\text{BuSCH}_2$ ] $^+$ , 105.06 (105.04) [ $\text{M} - ^n\text{BuSCH}_2 - \text{C}_4\text{H}_9$ ] $^+$

**1- $^t$ Butylthio-2-( $^t$ butylthio)methyl)butan-2-ol (8):**

$^1\text{H NMR}$  ( $\text{CDCl}_3$ , 250 MHz, +25 °C,  $\delta$  [ppm]): 0.95 (t,  $J=7.42$  Hz, 3H,  $\text{C-CH}_2\text{CH}_3$ ), 1.32 (s, 18H,  $\text{C}(\text{CH}_3)_3$ ), 1.61 (q,  $J=7.51$  Hz, 2H,  $\text{C-CH}_2\text{CH}_3$ ), 2.63 (d,  $J=12.09$  Hz, 1H,  $\text{S-CH}_2\text{-C}$ ), 2.80 (d,  $J=12.09$  Hz, 1H,  $\text{S-CH}_2\text{-C}$ ), 2.77 (s, 1H,  $\text{OH}$ );  $^{13}\text{C}$   $\{^1\text{H}\}$  NMR ( $\text{CDCl}_3$ , 62.86 MHz, +25 °C,  $\delta$  [ppm]): 8.0 (s,  $\text{C-CH}_2\text{CH}_3$ ), 31.1 (s,  $\text{C}(\text{CH}_3)_3$ ), 31.7 (s,  $\text{C-CH}_2\text{CH}_3$ ), 37.5 (s,  $\text{S-CH}_2\text{-C}$ ), 42.4 (s,  $\text{C}(\text{CH}_3)_3$ ), 72.8 (s,  $\text{C-OH}$ ); IR (ATR,  $\text{cm}^{-1}$ ):  $\nu=3475$  (br, OH), 2961 (s, CH); GC-EIMS ( $m/z$ ) found (calc.): 207.06 (207.09) [ $\text{M} - ^t\text{C}_4\text{H}_9$ ] $^+$ , 132.96 (133.07) [ $\text{M} - ^t\text{BuSCH}_2 - \text{C}_2\text{H}_4$ ] $^+$ , 57.04 (57.07) [ $\text{C}_4\text{H}_9$ ] $^+$

1-Isopropylthio-2((isopropylthio)methyl)butan-2-ol (9)

$^1\text{H NMR}$  ( $\text{CDCl}_3$ , 250 MHz, +25 °C,  $\delta$  [ppm]): 0.92 (t,  $J=7.54$  Hz, 3H, C- $\text{CH}_2\text{CH}_3$ ), 1.27 (d,  $J=7.08$  Hz, 12H, C( $\text{CH}_3$ ) $_2$ ), 1.62 (q,  $J=7.47$  Hz, 2H, C- $\text{CH}_2\text{CH}_3$ ), 2.32 (s, br., 1H, OH), 2.66 (d,  $J=12.84$  Hz, 2H, S- $\text{CH}_2\text{-C}$ ), 2.81 (d,  $J=12.84$  Hz, 2H, S- $\text{CH}_2\text{-C}$ ) 2.94 (m,  $J=6.66$  Hz, 2H,  $\text{CH}(\text{CH}_3)_2$ );  $^{13}\text{C}$  { $^1\text{H}$ } NMR ( $\text{CDCl}_3$ , 62.86 MHz, +25 °C,  $\delta$  [ppm]): 8.0 (s, C- $\text{CH}_2\text{CH}_3$ ), 23.7 (s,  $\text{CH}(\text{CH}_3)_2$ ), 31.4 (s, C- $\text{CH}_2\text{CH}_3$ ), 36.8 (s,  $\text{CH}(\text{CH}_3)_2$ ), 39.7 (s, S- $\text{CH}_2\text{-C}$ ), 73.8 (s, C-OH); IR (ATR,  $\text{cm}^{-1}$ ):  $\nu=3475$  (br, OH), 2960 (s, CH), 1238 (s, OH); GC-EIMS ( $m/z$ ) found (calc.): 236.07 (236.13) [ $\text{M}]^+$ , 193.03 (193.07) [ $\text{M} - ^i\text{C}_3\text{H}_9$ ] $^+$ , 132.97 (133.07) [ $\text{M} - ^i\text{PrS} - \text{C}_2\text{H}_4$ ] $^+$ , 104.98 (105.04) [ $\text{M} - ^i\text{C}_3\text{H}_9 - i\text{PrSCH}_2$ ] $^+$

1- $^n$ Butylthio-2((diethylamino)methyl)butan-2-ol (10):

$^1\text{H NMR}$  ( $\text{CDCl}_3$ , 250 MHz, +25 °C,  $\delta$  [ppm]): 0.90 (t,  $J=7.30$  Hz, 6H, C- $\text{CH}_2\text{CH}_3$ ,  $\text{CH}_3\text{CH}_2\text{CH}_2$ ), 1.01 (t,  $J=7.17$  Hz, 6H, N( $\text{CH}_2\text{CH}_3$ ) $_2$ ), 1.41 (m,  $J=7.25$  Hz, 2H,  $\text{CH}_3\text{CH}_2\text{CH}_2$ ), 1.46-1.64 (m, 4H,  $\text{CH}_2\text{CH}_2\text{-S}$ , C- $\text{CH}_2\text{CH}_3$ ), 2.33 (d,  $J=14.04$  Hz, 1H, S- $\text{CH}_2\text{-C}$ ), 2.51-2.66 (m, 9H,  $\text{CH}_2\text{CH}_2\text{-S}$ , S- $\text{CH}_2\text{-C}$ , N- $\text{CH}_2\text{-C}$ , N( $\text{CH}_2\text{CH}_3$ ) $_2$ ), 3.80 (s, 1H, OH);  $^{13}\text{C}$  { $^1\text{H}$ } NMR ( $\text{CDCl}_3$ , 62.86 MHz, +25 °C,  $\delta$  [ppm]): 7.9 (s, C- $\text{CH}_2\text{CH}_3$ ), 12.4 (s, N( $\text{CH}_2\text{CH}_3$ ) $_2$ ), 13.8 (s,  $\text{CH}_3\text{CH}_2\text{CH}_2$ ), 22.1 (s,  $\text{CH}_3\text{CH}_2\text{CH}_2$ ), 30.7 (s, C- $\text{CH}_2\text{CH}_3$ ), 32.0 (s,  $\text{CH}_2\text{CH}_2\text{-S}$ ), 33.6 (s, S- $\text{CH}_2\text{CH}_2$ ), 40.7 (s, S- $\text{CH}_2\text{-C}$ ), 49.1 (s, N( $\text{CH}_2\text{CH}_3$ ) $_2$ ), 59.8 (s, N- $\text{CH}_2\text{-C}$ ), 72.7 (s, C-OH); IR (ATR,  $\text{cm}^{-1}$ ):  $\nu=3465$  (br, OH), 2963 (s, CH), 1063 (s, C-N); GC-EIMS ( $m/z$ ) found (calc.): 144.08 (144.14) [ $\text{M} - ^n\text{BuSCH}_2$ ] $^+$ , 86.03 (86.10) [ $\text{Et}_2\text{NCH}_2$ ] $^+$ , 58.10 (58.04) [ $\text{CH}_3\text{C(=O)CH}_3$ ] $^+$

1- $^t$ Butylthio-2((diethylamino)methyl)butan-2-ol (11):

$^1\text{H NMR}$  ( $\text{CDCl}_3$ , 250 MHz, +25 °C,  $\delta$  [ppm]): 0.93 (t,  $J=7.34$  Hz, 3H, C- $\text{CH}_2\text{CH}_3$ ), 1.01 (t,  $J=7.09$  Hz, 6H, N( $\text{CH}_2\text{CH}_3$ ) $_2$ ), 1.31 (s, 9H, C( $\text{CH}_3$ ) $_3$ ), 1.49 (m, 2H, C- $\text{CH}_2\text{CH}_3$ ), 2.31 (d,  $J=14.05$  Hz, 1H, S- $\text{CH}_2\text{-C}$ ) 2.50-2.69 (m, 7H, C- $\text{CH}_2\text{-S}$ , N- $\text{CH}_2\text{-C}$ , N( $\text{CH}_2\text{CH}_3$ ) $_2$ ), 3.89 (s, 1H, OH);  $^{13}\text{C}$  { $^1\text{H}$ } NMR ( $\text{CDCl}_3$ , 62.86 MHz, +25 °C,  $\delta$  [ppm]): 7.7 (s, C- $\text{CH}_2\text{CH}_3$ ), 12.5 (s, N( $\text{CH}_2\text{CH}_3$ ) $_2$ ), 30.9 (s, C- $\text{CH}_2\text{CH}_3$ ), 30.9 (s, C( $\text{CH}_3$ ) $_3$ ), 35.9 (s, S- $\text{CH}_2\text{-C}$ ), 41.8 (s, C( $\text{CH}_3$ ) $_3$ ), 49.18 (s, N( $\text{CH}_2\text{CH}_3$ ) $_2$ ), 60.3 (s, N- $\text{CH}_2\text{-C}$ ), 72.1 (s, C-OH); IR (ATR,  $\text{cm}^{-1}$ ):  $\nu=3467$  (br, OH), 2964 (s, CH), 1064 (s, C-N); GC-EIMS ( $m/z$ ) found (calc.): 144.10 (144.14) [ $\text{M} - ^t\text{BuSCH}_2$ ] $^+$ , 86.02 (86.10) [ $\text{Et}_2\text{NCH}_2$ ] $^+$ , 58.10 (58.04) [ $\text{CH}_3\text{C(=O)CH}_3$ ] $^+$

1-Diethylamino-2((isopropylthio)methyl)butan-2-ol (12)

$^1\text{H NMR}$  ( $\text{CDCl}_3$ , 250 MHz, +25 °C,  $\delta$  [ppm]): 0.91 (t,  $J=7.41$  Hz, 3H, C- $\text{CH}_2\text{CH}_3$ ), 1.01 (t,  $J=7.09$  Hz, 6H, N( $\text{CH}_2\text{CH}_3$ ) $_2$ ), 1.27 (d,  $J=6.62$  Hz, 6H,  $\text{CH}(\text{CH}_3)_2$ ), 1.46-1.61 (m, 2H, C- $\text{CH}_2\text{CH}_3$ ), 2.33 (d,  $J=14.04$  Hz, 1H, S- $\text{CH}_2\text{-C}$ ), 2.53-2.69 (m, 7H, S- $\text{CH}_2\text{-C}$ , N- $\text{CH}_2\text{-C}$ , N( $\text{CH}_2\text{CH}_3$ ) $_2$ ), 2.90 (m,  $J=6.67$  Hz, 1H,  $\text{CH}(\text{CH}_3)_2$ ), 3.83 (s, 1H, OH);  $^{13}\text{C}$  { $^1\text{H}$ } NMR ( $\text{CDCl}_3$ , 62.86 MHz, +25 °C,  $\delta$  [ppm]): 7.8 (s, C- $\text{CH}_2\text{CH}_3$ ), 12.4 (s, N( $\text{CH}_2\text{CH}_3$ ) $_2$ ), 23.6 (s,  $\text{CH}(\text{CH}_3)_2$ ), 30.8 (s, C- $\text{CH}_2\text{CH}_3$ ), 36.3 (s,  $\text{CH}(\text{CH}_3)_2$ ), 38.7 (s, S- $\text{CH}_2\text{-C}$ ), 49.1 (s, N( $\text{CH}_2\text{CH}_3$ ) $_2$ ), 60.0 (s, N- $\text{CH}_2\text{-C}$ ), 72.5 (s, C-OH); IR (ATR,  $\text{cm}^{-1}$ ):  $\nu=3458$  (br, OH), 2966 (s, CH), 1063 (s, C-N); GC-EIMS ( $m/z$ ) found (calc.): 144.15 (144.14) [ $\text{M} - ^t\text{BuSCH}_2$ ] $^+$ , 86.04 (86.10) [ $\text{Et}_2\text{NCH}_2$ ] $^+$ , 58.09 (58.09) [ $\text{CH}_3\text{C(=O)CH}_3$ ] $^+$

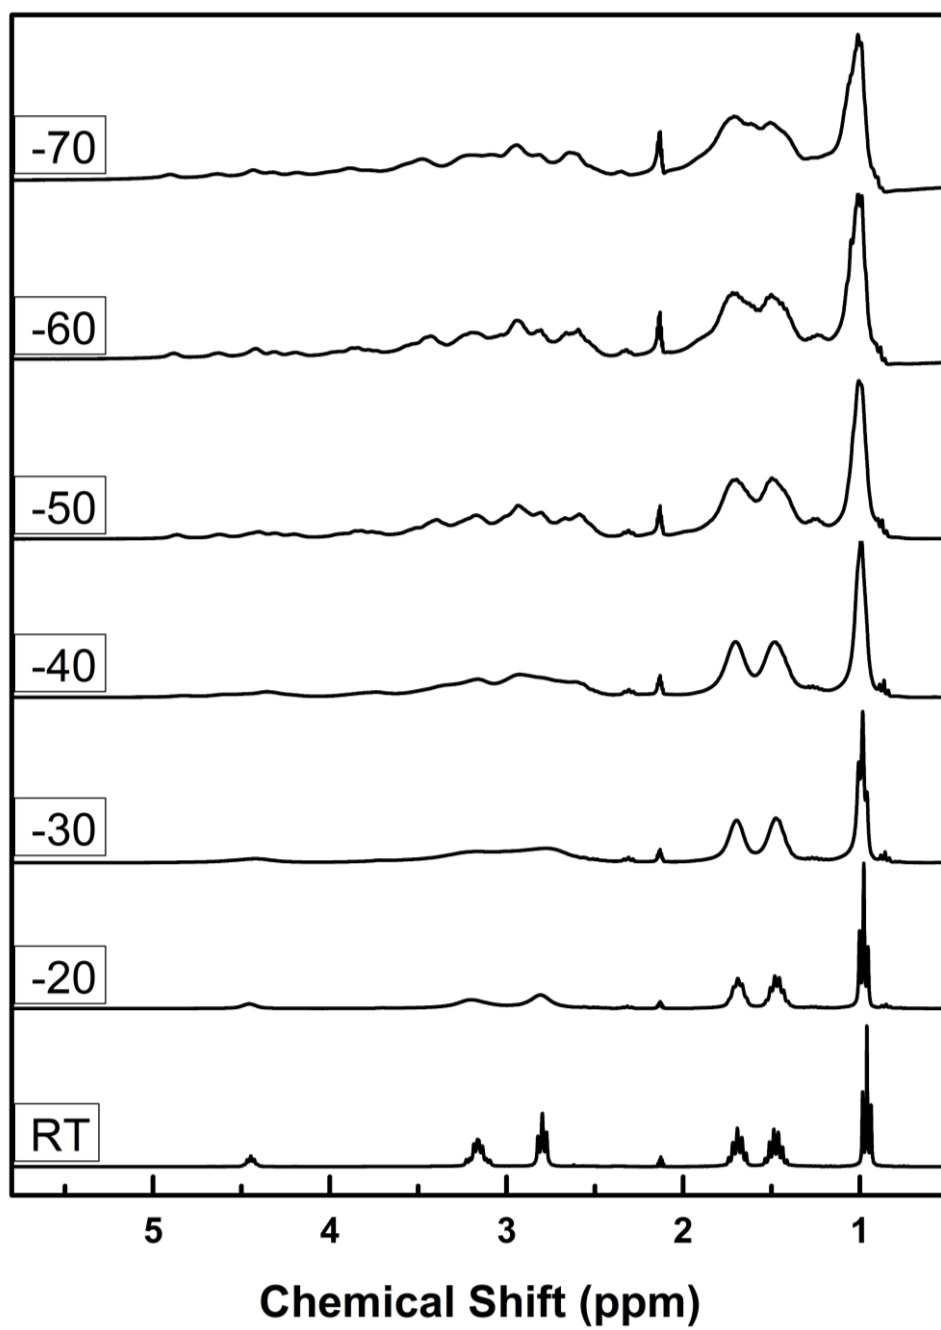

**Fig. S1:** Variable temperature NMR spectra for **In1** in toluene d<sup>8</sup> at different temperatures down to -70 °C.



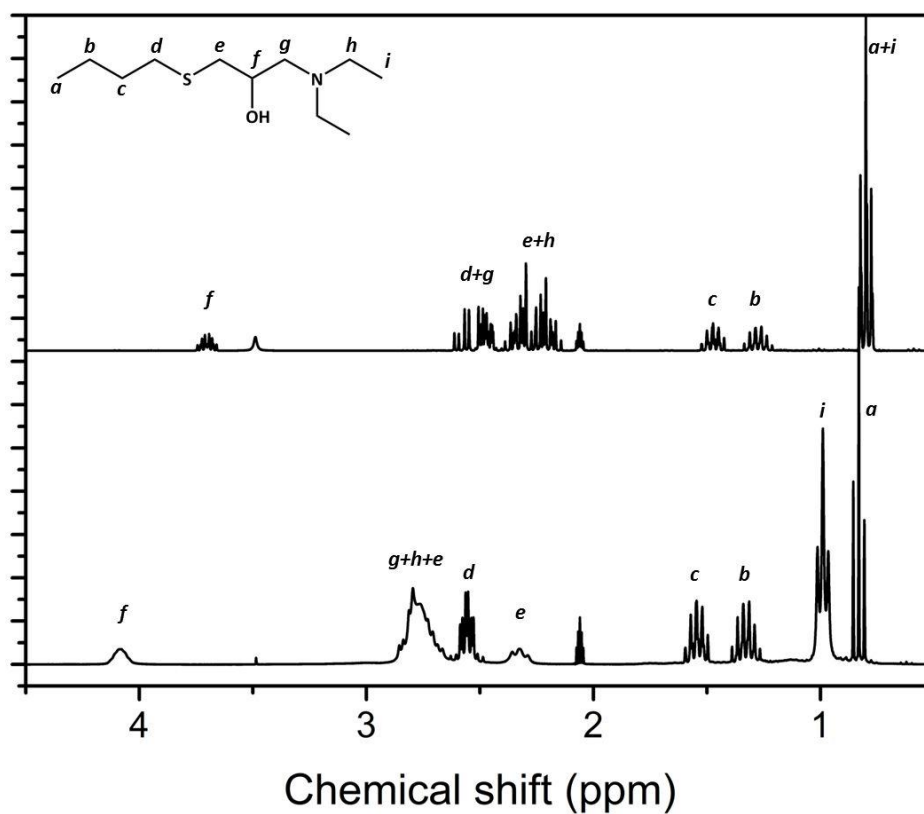

**Fig. S2:**  $^1\text{H}$  NMR spectra the alkanol (**4**) in free form in  $\text{CDCl}_3$  and the respective homoleptic In alkoxide **In4**. It is obvious that the signals related to the amine side chain are shifted strongly downfield due to the coordination to the metal centre. The peaks related to the thioether side chain remain almost unaffected.

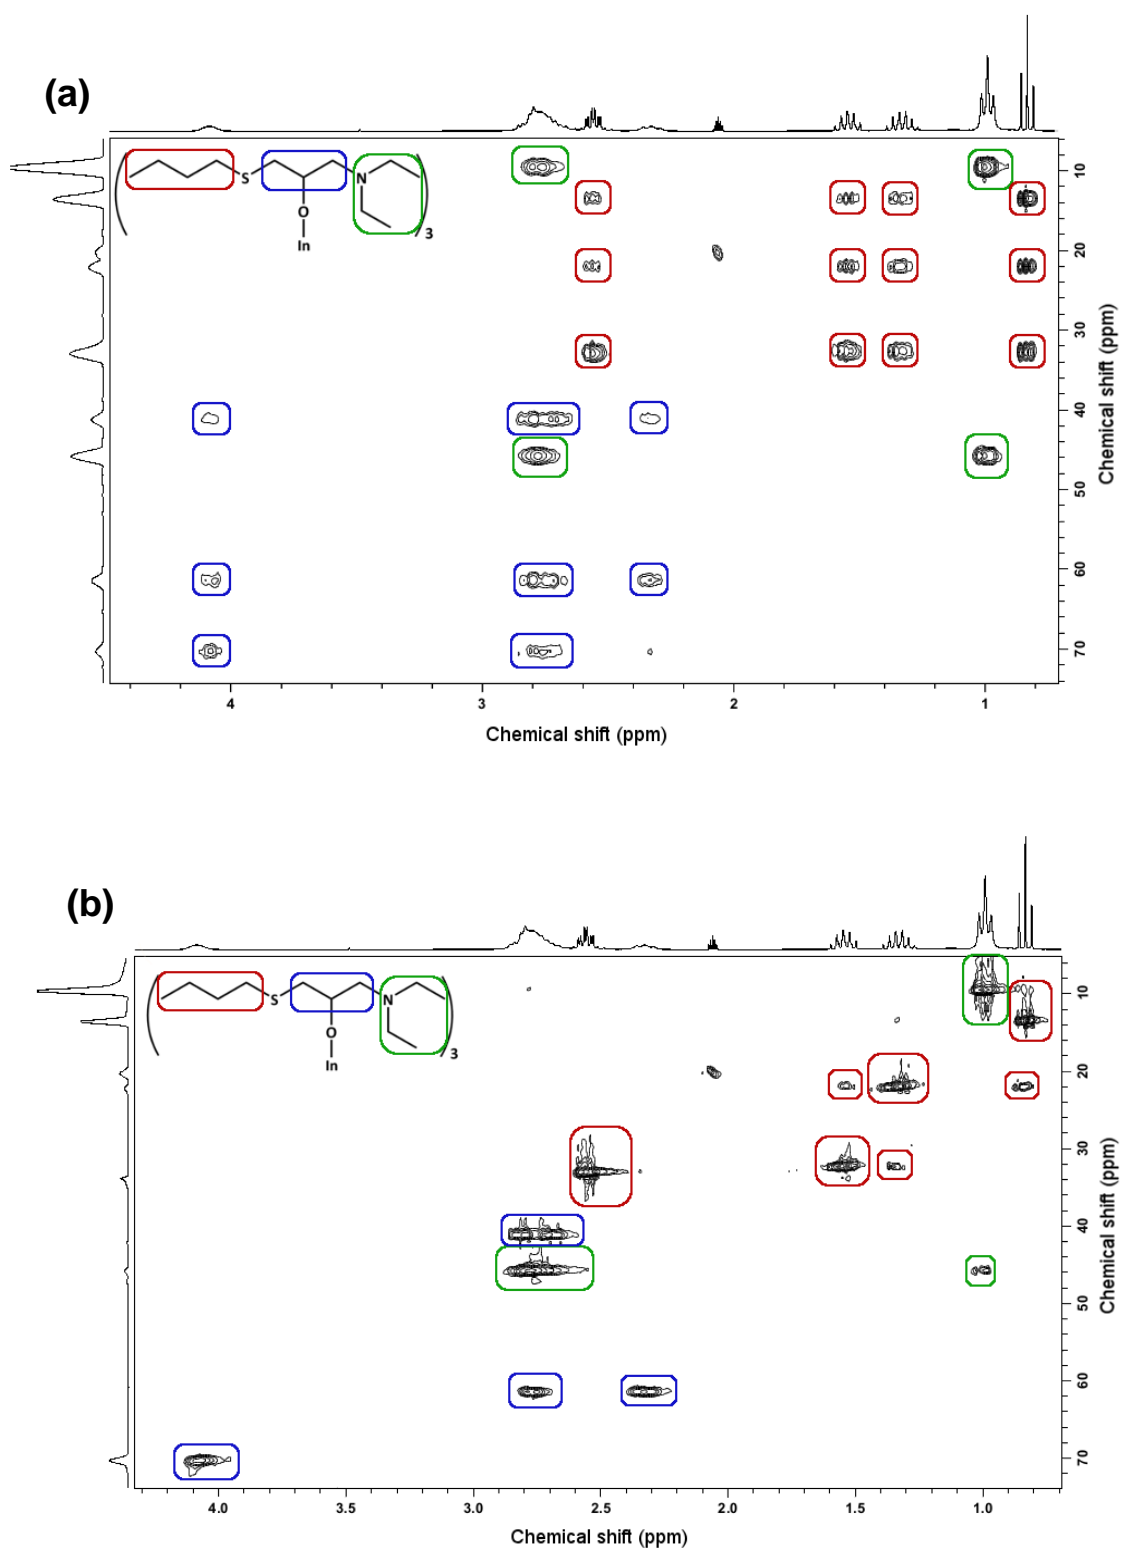

**Fig. S 3:** 2D NMR spectra of **In4** as illustrated in the images. a) (HSQC-TOCSY) and (b) (HSQC-DEPT) show colour coded the  $^1\text{H}$ - $^{13}\text{C}$  correlations of the different parts of the molecule measured in deuterated toluene.

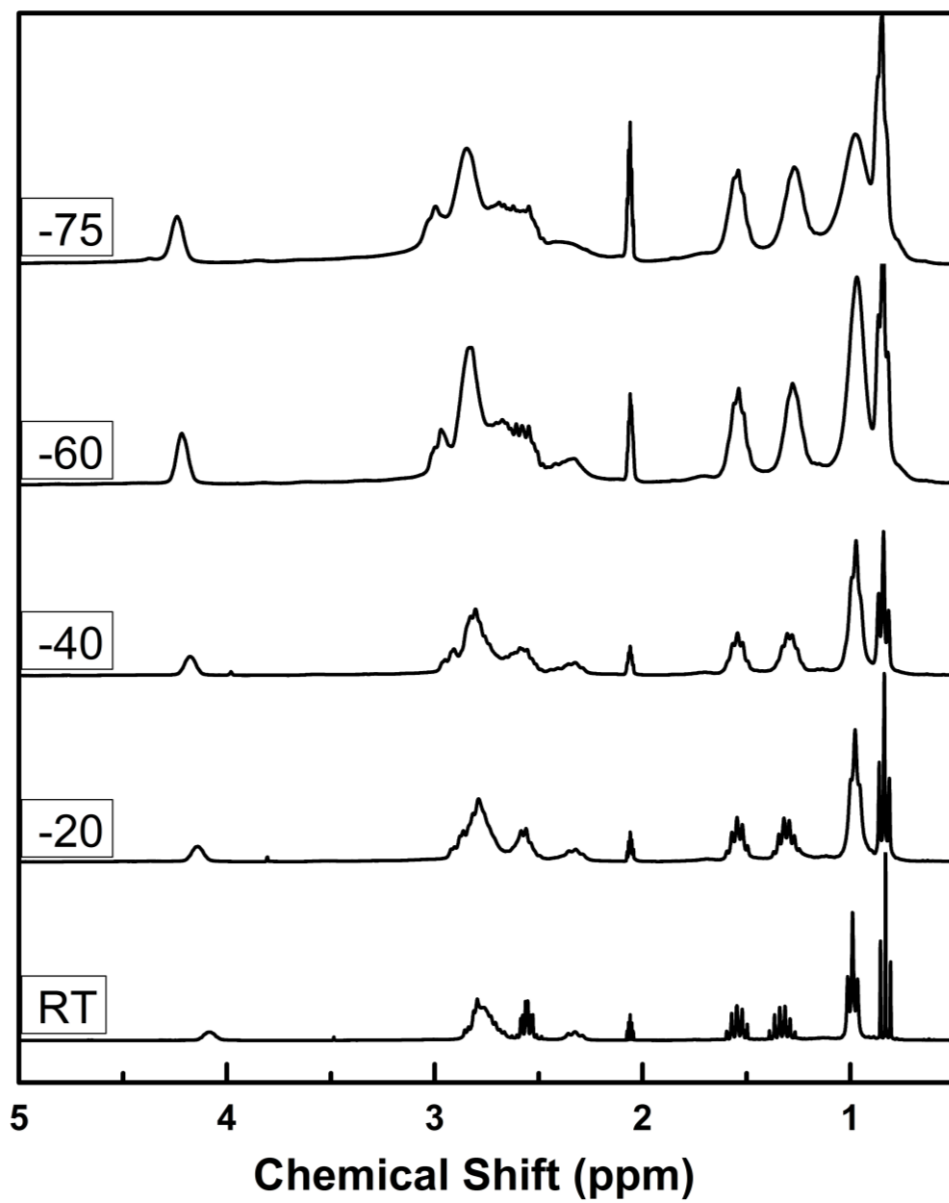

**Fig. S 4:** Variable temperature  $^1\text{H}$  spectra of **In4** in deuterated toluene from RT to -70 °C.

(a)

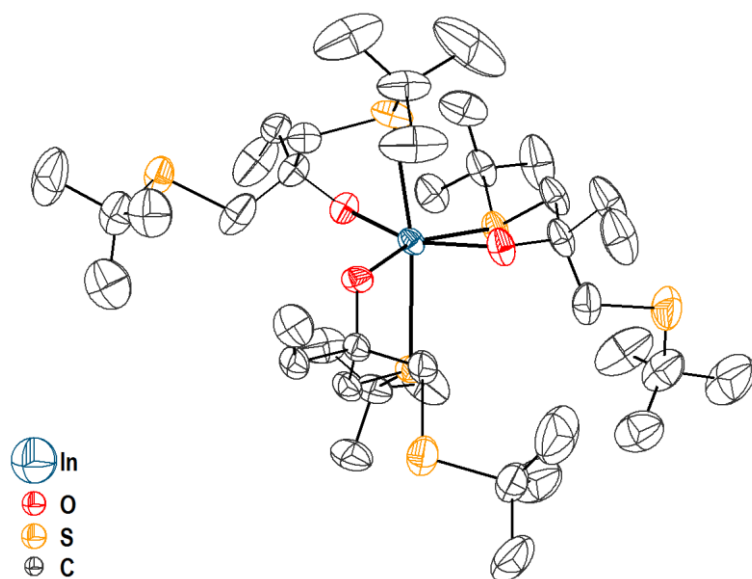

(b)

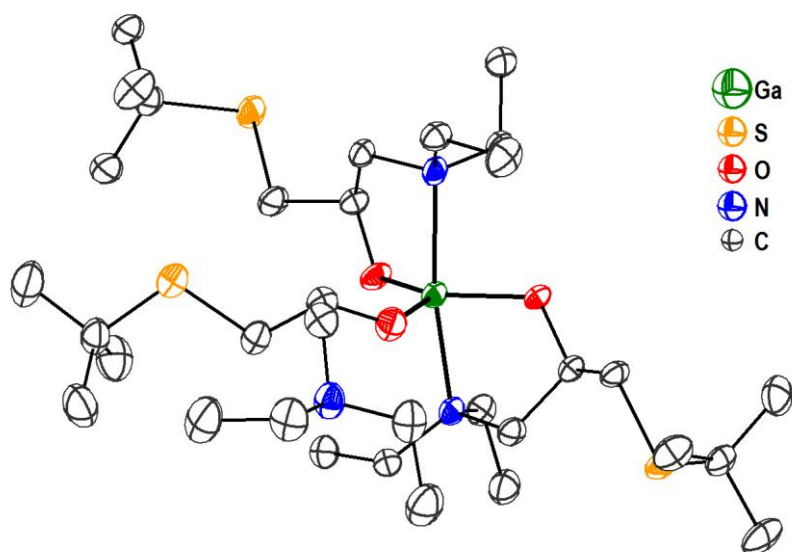

**Fig. S5:** Thermal ellipsoids with 50% probability of (a)  $\text{In}(\text{OCt}(\text{CH}_2\text{S}^t\text{Bu})_2)_3$  **In8** and (b)  $\text{Ga}(\text{OCH}(\text{CH}_2\text{S}^t\text{Bu})(\text{CH}_2\text{NEt}_2))_3$  **Ga5**.

**Table S2:** Crystal data, data collection parameters and refinement details of **In68** and **Ga5**.

|                                                                                                      | <b>Ga5</b>                                                                     | <b>In8</b> + C <sub>3</sub> H <sub>12</sub>                     |
|------------------------------------------------------------------------------------------------------|--------------------------------------------------------------------------------|-----------------------------------------------------------------|
| <b>Chemical formula</b>                                                                              | GaO <sub>3</sub> N <sub>3</sub> S <sub>3</sub> C <sub>33</sub> H <sub>72</sub> | InO <sub>3</sub> S <sub>6</sub> C <sub>44</sub> H <sub>93</sub> |
| <b>M [g/mol]</b>                                                                                     | 724.84                                                                         | 977.36                                                          |
| <b>Crystal system</b>                                                                                | Triclinic                                                                      | Triclinic                                                       |
| <b>Space group</b>                                                                                   | P $\bar{1}$                                                                    | P $\bar{1}$                                                     |
| <b>a [Å]</b>                                                                                         | 10.9239(16)                                                                    | 10.5221(8)                                                      |
| <b>b [Å]</b>                                                                                         | 12.8002(12)                                                                    | 14.8955(11)                                                     |
| <b>c [Å]</b>                                                                                         | 17.470(4)                                                                      | 18.5318(13)                                                     |
| <b><math>\alpha</math> [°]</b>                                                                       | 108.527(4)                                                                     | 84.795(2)                                                       |
| <b><math>\beta</math> [°]</b>                                                                        | 97.665(4)                                                                      | 83.722(2)                                                       |
| <b><math>\gamma</math> [°]</b>                                                                       | 108.690(2)                                                                     | 74.537(2)                                                       |
| <b>V [Å<sup>3</sup>]</b>                                                                             | 2117.5(6)                                                                      | 2776.9(4)                                                       |
| <b>Z</b>                                                                                             | 2                                                                              | 2                                                               |
| <b><math>\rho_{\text{calc.}}</math> [Mg·m<sup>-3</sup>]</b>                                          | 1.137                                                                          | 1.169                                                           |
| <b><math>\mu</math> [mm<sup>-1</sup>]</b>                                                            | 0.83                                                                           | 0.683                                                           |
| <b>Crystal size [mm]</b>                                                                             | 0.10 x 0.16 x 0.40                                                             | 0.30 x 0.35 x 0.40                                              |
| <b>Temperature [K]</b>                                                                               | 100(2)                                                                         | 200(2)                                                          |
| <b>No. of measured reflections</b>                                                                   | 11387                                                                          | 144925                                                          |
| <b>No. independent reflections</b>                                                                   | 7385                                                                           | 20301                                                           |
| <b>No. of observed reflections [I &gt; 2·<math>\sigma</math>(I)]</b>                                 | 5897                                                                           | 16308                                                           |
| <b>R<sub>Int</sub></b>                                                                               | 0.027                                                                          | 0.030                                                           |
| <b><math>\Theta_{\text{max}}</math> [°]</b>                                                          | 25.0                                                                           | 32.2                                                            |
| <b>Refinement on</b>                                                                                 | F <sup>2</sup>                                                                 | F <sup>2</sup>                                                  |
| <b>R[F<sup>2</sup>&gt;2<math>\sigma</math>(F)].<math>\omega</math>R(F<sup>2</sup>).S</b>             | 0.048. 0.144. 1.05                                                             | 0.040, 0.109, 1.13                                              |
| <b>No. of reflections</b>                                                                            | 7385                                                                           | 20301                                                           |
| <b>No. of parameters</b>                                                                             | 403                                                                            | 667                                                             |
| <b>No. of restraints</b>                                                                             | 0                                                                              | 92                                                              |
| <b>Weighting scheme values *</b>                                                                     | a = 0.0954. b = 0                                                              | a = 0.0348, b = 2.3567                                          |
| <b><math>\Delta\rho_{\text{max}}</math>. <math>\Delta\rho_{\text{min}}</math> (e·Å<sup>-3</sup>)</b> | 0.65. -1.43                                                                    | 1.71, -0.97                                                     |

\*  $\omega = [\sigma^2(F_o^2) + (a \cdot P)^2 + b \cdot P]^{-1}$  where  $P = (F_o^2 + 2F_c^2)/3$

**Table S3:** Selected Bond distances and bond angles of **In8** and **Ga5**.

| <b>In8</b> | Bond length [Å] |          | Bond angle (deg) | <b>Ga5</b> | Bond length [Å] |          | Bond angle (deg) |
|------------|-----------------|----------|------------------|------------|-----------------|----------|------------------|
| In-O1      | 2.0504(14)      | O1-In-O2 | 103.25(6)        | Ga-O1      | 1.866(2)        | O1-Ga-O2 | 131.75(10)       |
| In-O2      | 2.0599(13)      | O1-In-O3 | 156.61(6)        | Ga-O2      | 1.863(2)        | O1-Ga-O3 | 107.91(10)       |
| In-O3      | 2.0467(15)      | O2-In-O3 | 97.80(6)         | Ga-O3      | 1.842(2)        | O2-Ga-O3 | 120.09(10)       |
| In-S2      | 2.7210(6)       | O1-In-S2 | 73.30(4)         | Ga-N1      | 2.234(2)        | O1-Ga-N1 | 82.97(9)         |
| In-S4      | 2.7821(6)       | O1-In-S4 | 101.17(4)        | Ga-N2      | 2.219(3)        | O1-Ga-N2 | 90.67(9)         |
| In-S6      | 2.8123(5)       | O1-In-S6 | 87.40(4)         |            |                 | O2-Ga-N1 | 89.19(9)         |
|            |                 | O2-In-S2 | 95.61(4)         |            |                 | O2-Ga-N2 | 83.56(9)         |
|            |                 | O2-In-S4 | 78.29(4)         |            |                 | O3-Ga-N1 | 93.58(10)        |
|            |                 | O2-In-S6 | 162.94(4)        |            |                 | O3-Ga-N2 | 103.06(10)       |
|            |                 | O3-In-S2 | 94.78(5)         |            |                 | N1-Ga-N2 | 163.32(9)        |
|            |                 | O3-In-S4 | 92.90(5)         |            |                 |          |                  |
|            |                 | O3-In-S6 | 74.75(4)         |            |                 |          |                  |
|            |                 | S2-In-S4 | 170.790(19)      |            |                 |          |                  |
|            |                 | S2-In-S6 | 100.250(19)      |            |                 |          |                  |
|            |                 | S4-In-S6 | 86.662(18)       |            |                 |          |                  |

**References:**

1. T. K. Todsén, C. B. Pollard and E. G. Rietz, *Journal of the American Chemical Society*, 1950, **72**, 4000-4002.
2. C. Tanyeli, A. S. Demir, I. M. Akhmedov, E. Özgül and C. G. Kandemir, *Synth. Commun.*, 1996, **26**, 2967-2980.
